# Supplementary material for: TiO2seed-assisted growth of VO2(M) films and thermochromic performance
Source: Royal Society of Chemistry journal article supplement (doi:10.1039/c6ce01658h), 2016-01-01
Supplement: c6ce01658h1.pdf [file c6ce01658h1.pdf]

## Supporting Information

### TiO<sub>2</sub> seed-assistant growth of VO<sub>2</sub>(M) films and thermochromic performance

Li Zhong,<sup>a,b</sup> Yuanyuan Luo,<sup>a</sup> Ming Li,<sup>a</sup> Yuyan Han<sup>c</sup> Hua Wang,<sup>a,b</sup> Sichao Xu<sup>a</sup> and Guanghai Li<sup>a,b,\*</sup>

<sup>a</sup>Key Laboratory of Materials Physics, Anhui Key Laboratory of Nanomaterials and Nanotechnology, Institute of Solid State Physics, Chinese Academy of Sciences, Hefei 230031, P. R. China.

<sup>b</sup>School of Chemistry and Materials Science, University of Science and Technology of China, Hefei 230031, P.R. China.

<sup>c</sup>High Magnetic Field Laboratory, Chinese Academy of Science, Hefei 230031, P. R. China.

\*Corresponding author: ghli@issp.ac.cn,

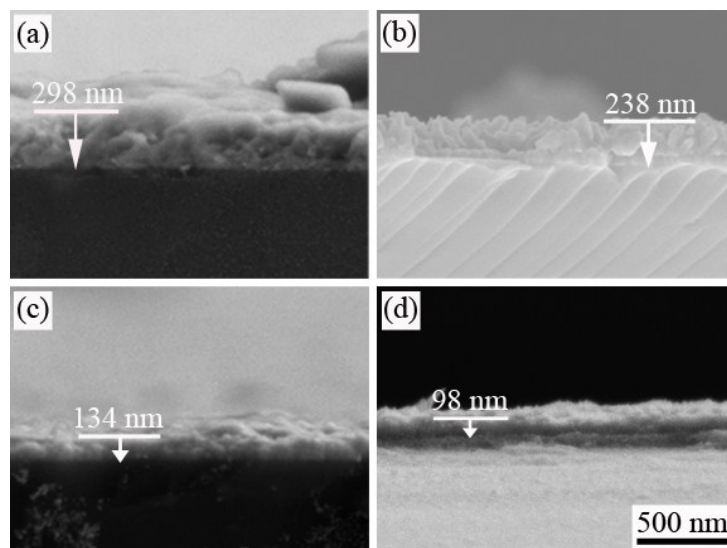

**Fig. S1** Cross section FESEM images of as-prepared composite films: (a) sample I, (b) II, (c) III and (d) IV.

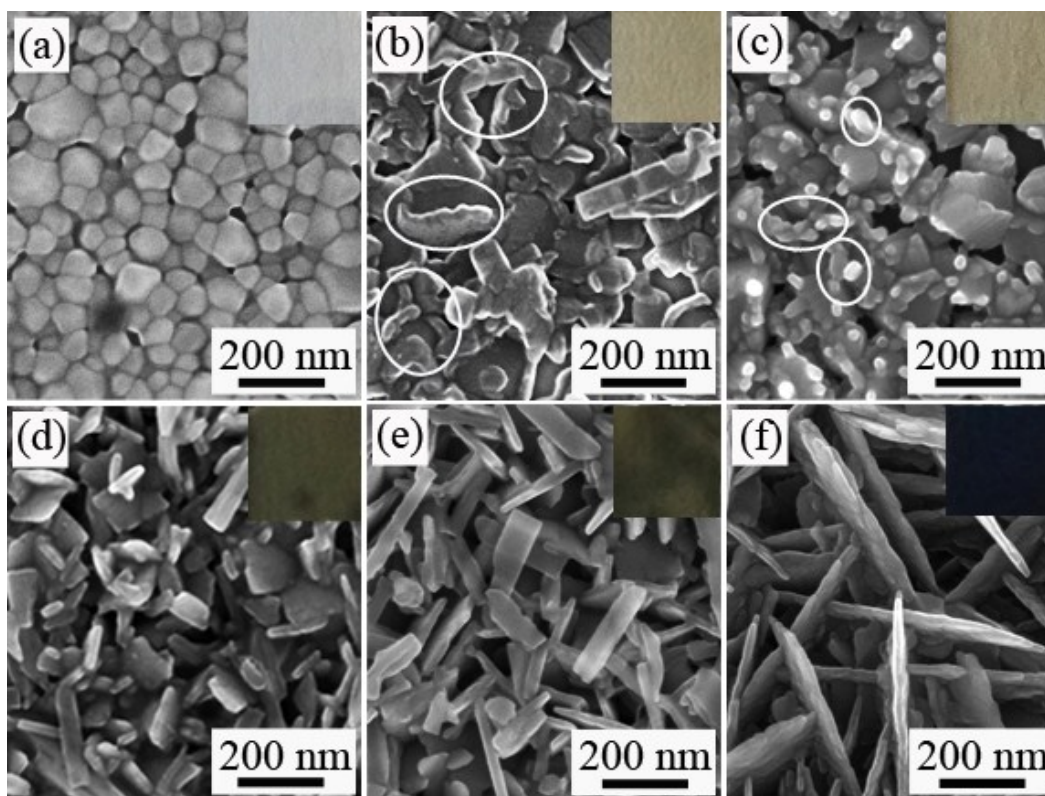

**Fig. S2** FESEM images of  $\text{VO}_2/\text{TiO}_2$  composite film obtained at the reaction time of (a) 0, (b) 13, (c) 16, (d) 18, (e) 21, and (f) 26 h. The insets are the optical photography of the corresponding film.

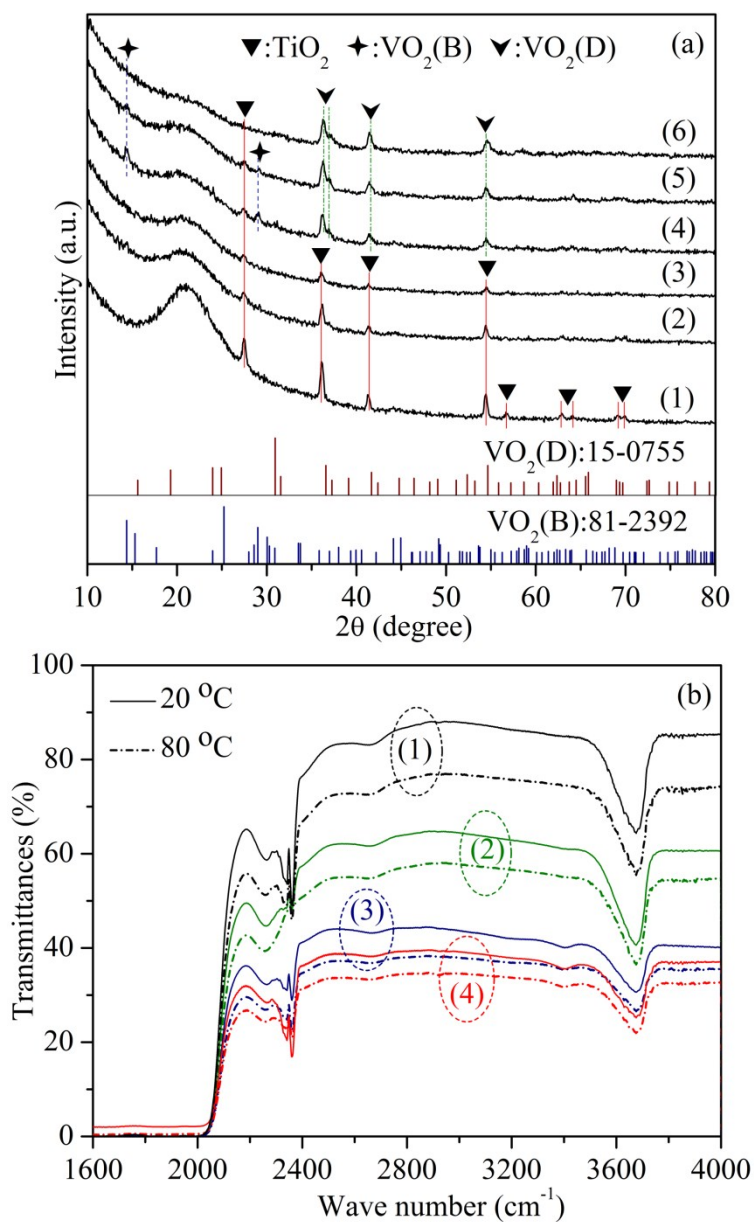

**Fig. S3** (a) XRD patterns of  $\text{VO}_2/\text{TiO}_2$  composite film obtained at the reaction time of (1) 0, (2) 13, (3) 16, (4) 18, (5) 21, and (6) 26 h, and (b) variable-temperature FT-IR spectra of the as-prepared  $\text{VO}_2/\text{TiO}_2$  composite films at reaction time of (1) 13, (2) 16, (3) 18 and (4) 21 h. The  $\text{VO}_2(\text{B})$  diffraction peaks in curves (4) and (5) in Fig. S3a at the reaction time of 18 and 21 h is considered come from the solution that attaches on the surface of  $\text{VO}_2(\text{D})$  film.

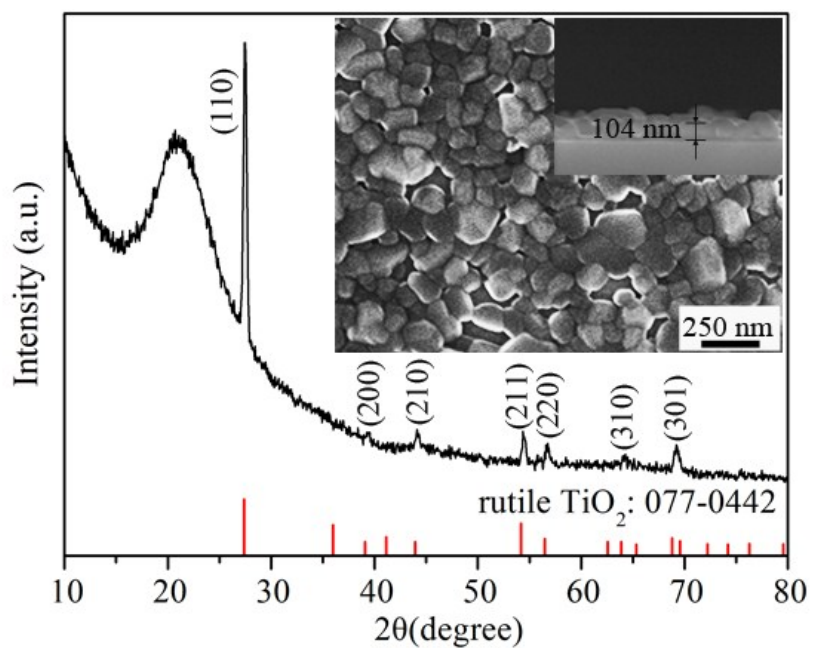

**Fig.S4** XRD pattern of  $\text{TiO}_2$  seed layer with [110] preferential orientation on quartz substrate. The insets are corresponding surface and cross section FESEM images.

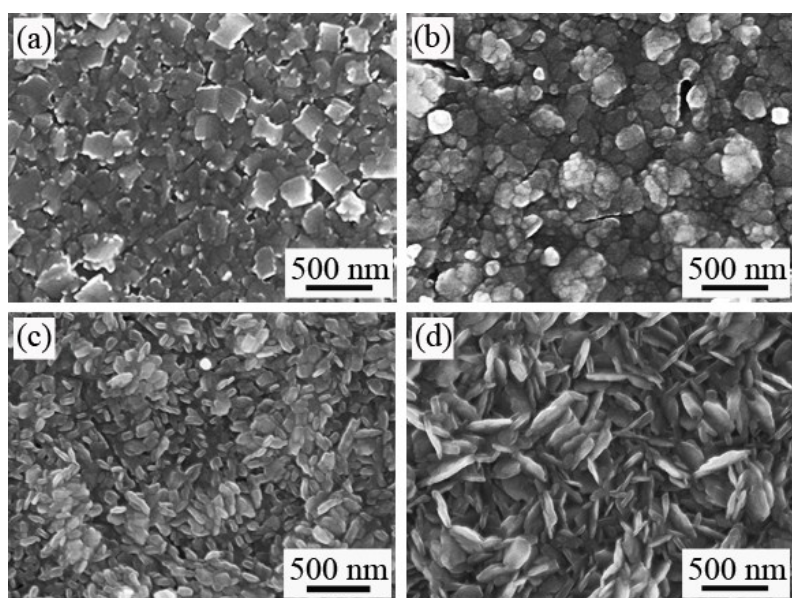

**Fig.S5** FESEM images of  $\text{VO}_2/\text{TiO}_2$  composite film at the reaction time of (a) 10, (b) 10.5, (c) 11 and (d) 13 h on [110] preferential orientation rutile  $\text{TiO}_2$  seed layer.

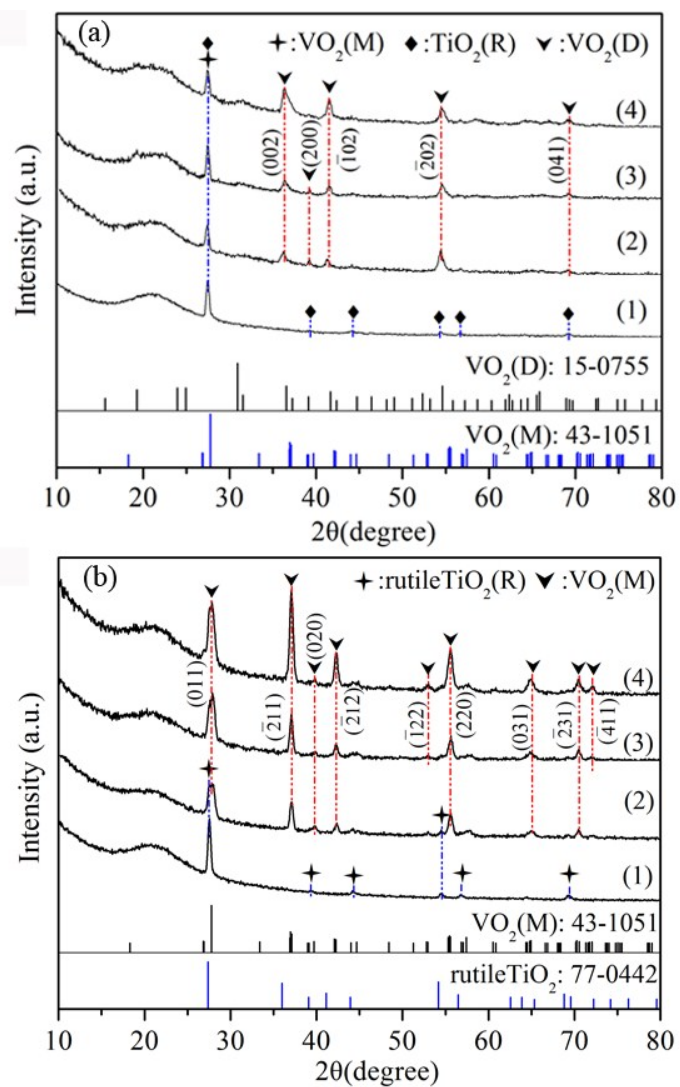

**Fig.S6** XRD patterns of VO<sub>2</sub>/TiO<sub>2</sub> composite film obtained at the reaction time of (1) 10, (2) 10.5, (3) 11 and (4) 13 h before (a) and after (b) annealing treatment grown on [110] preferential orientation rutile TiO<sub>2</sub> seed layer.

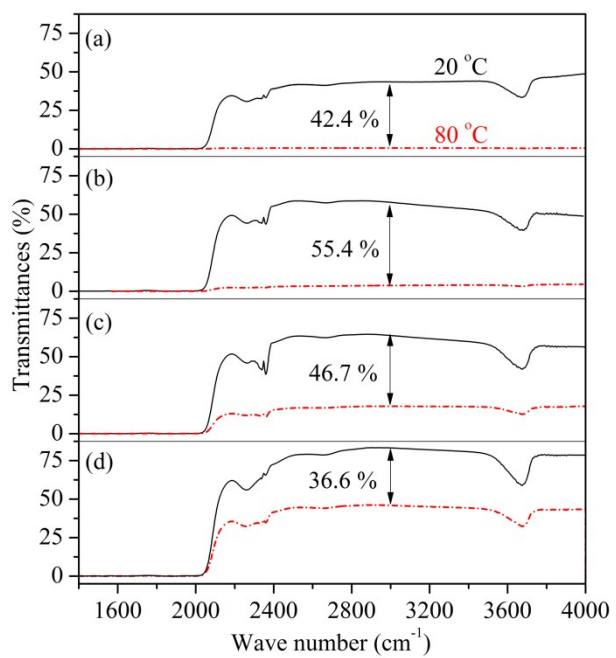

**Fig. S7** Variable-temperature FT-IR spectra of VO<sub>2</sub>(M)/TiO<sub>2</sub> composite films before and after phase transition with the thickness of (a) 298, (b) 238, (c) 134 and (d) 98 nm.
